# Supplementary material
Source: MDPI journal article supplement (https://www.mdpi.com/2624-7402/6/1/46)

## SUPPLEMENTARY MATERIAL

Figure S1. End-Effector detailed drawings (page 2-13).

End-Effector Assembly

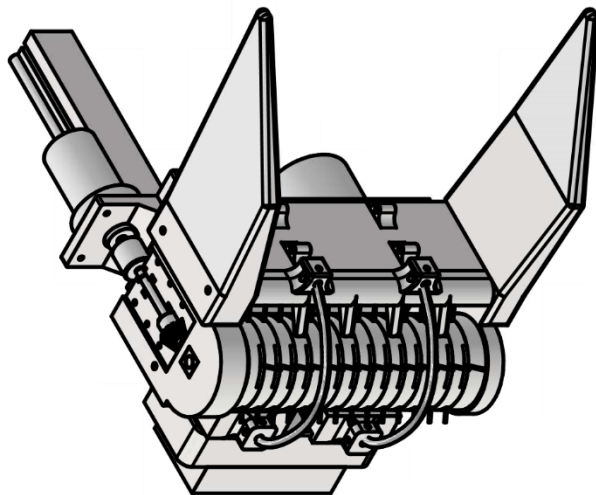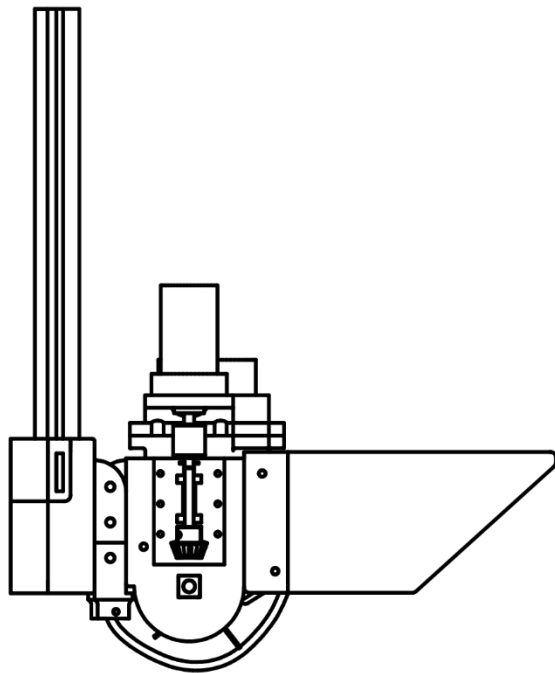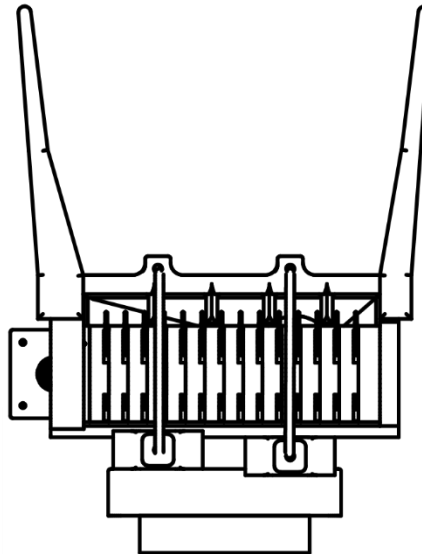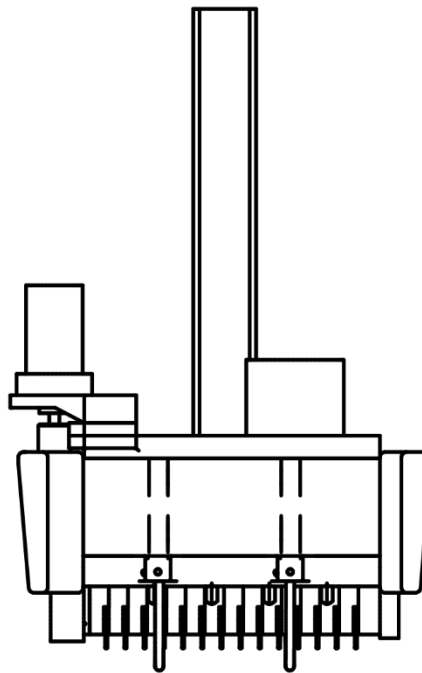

|                                                                                                                       |                                                                                                                                             |              |          |  |
|-----------------------------------------------------------------------------------------------------------------------|---------------------------------------------------------------------------------------------------------------------------------------------|--------------|----------|--|
|  UNIVERSITY OF<br><b>GEORGIA</b> | Thesis Title on:<br>"Development of a Robotic Cotton Harvesting System Based on the Approach of Harvesting Multiple Cotton Bolls at a Time" |              |          |  |
| DESIGNED BY: SHEKHAR THAPA                                                                                            | Project Title: End-Effector Assembly                                                                                                        | Scale: 1 / 6 | Unit: mm |  |
| 2/24/2023                                                                                                             | Filename: End-Effector- v2.iam                                                                                                              | Sheet #: 2   |          |  |

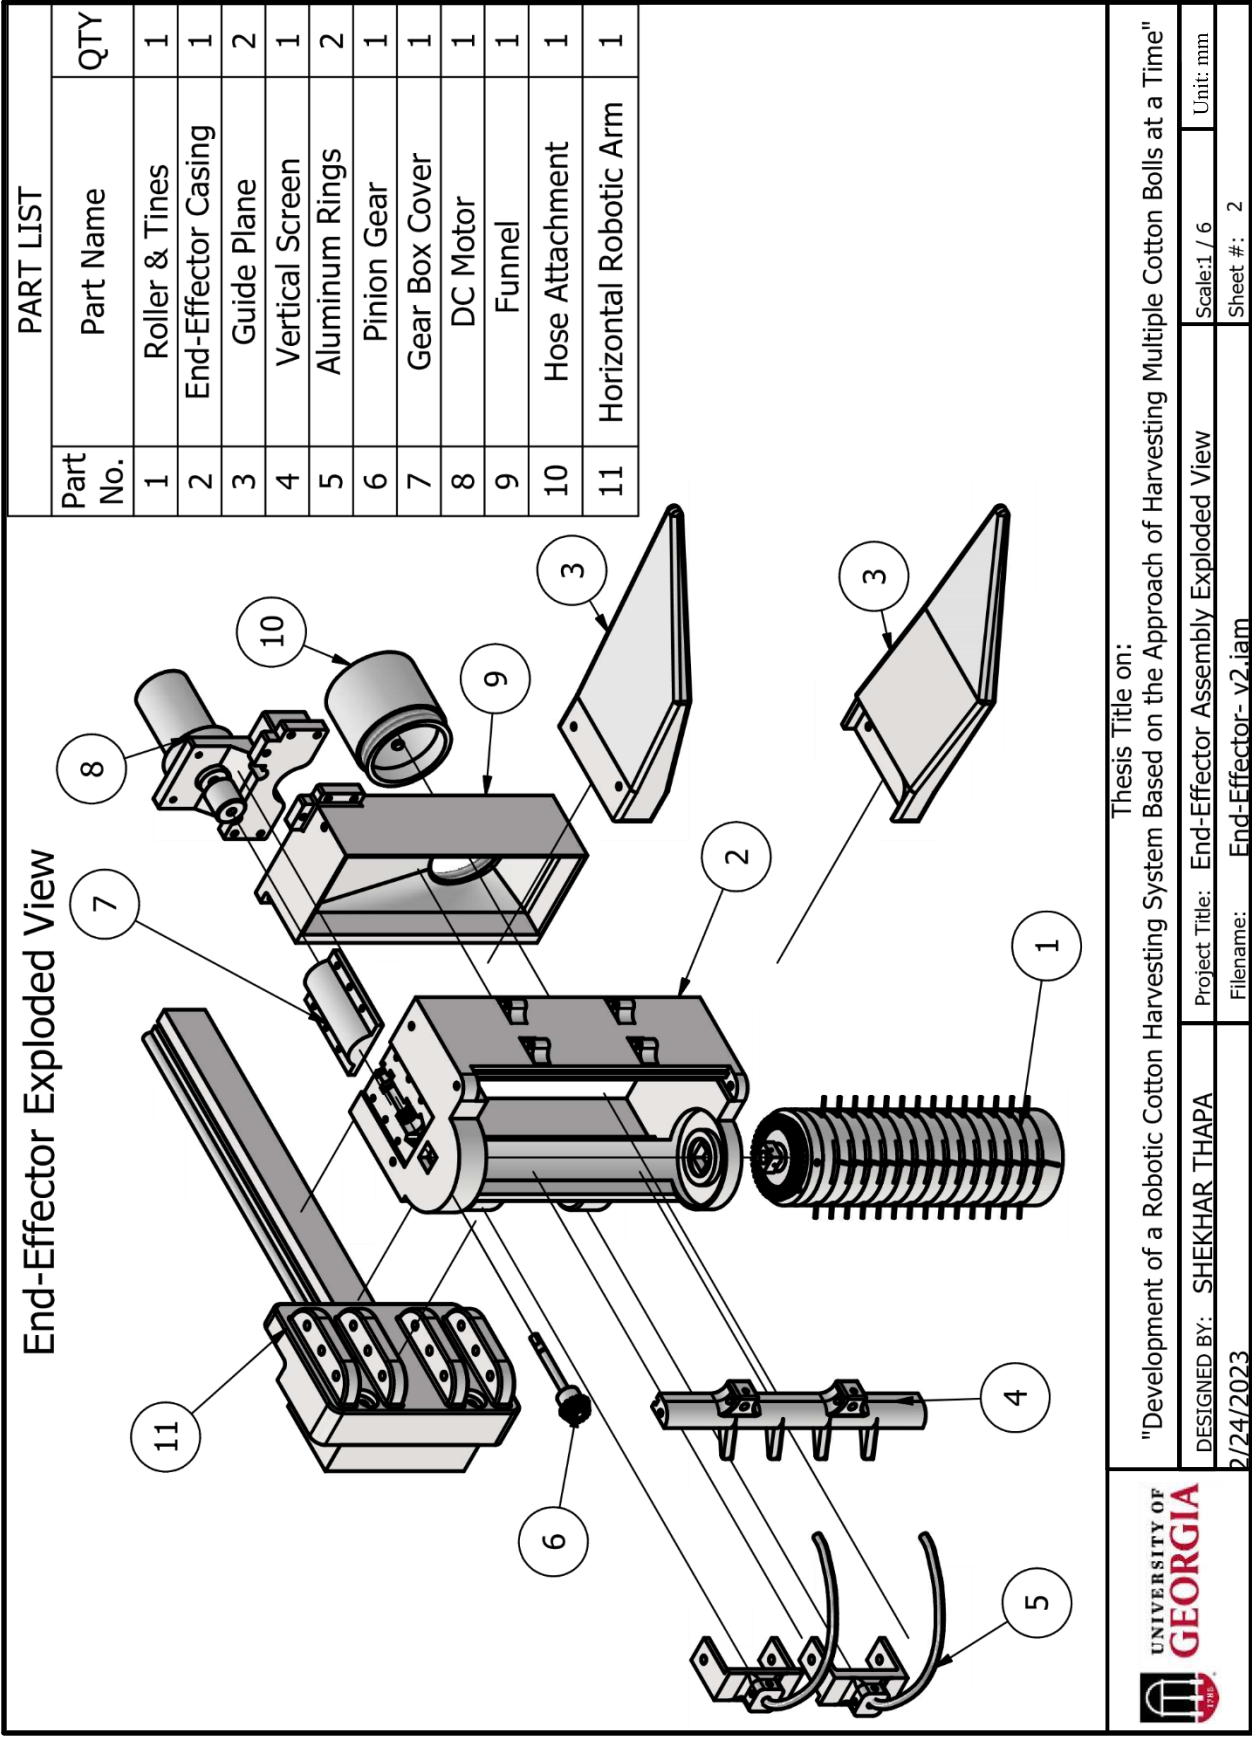

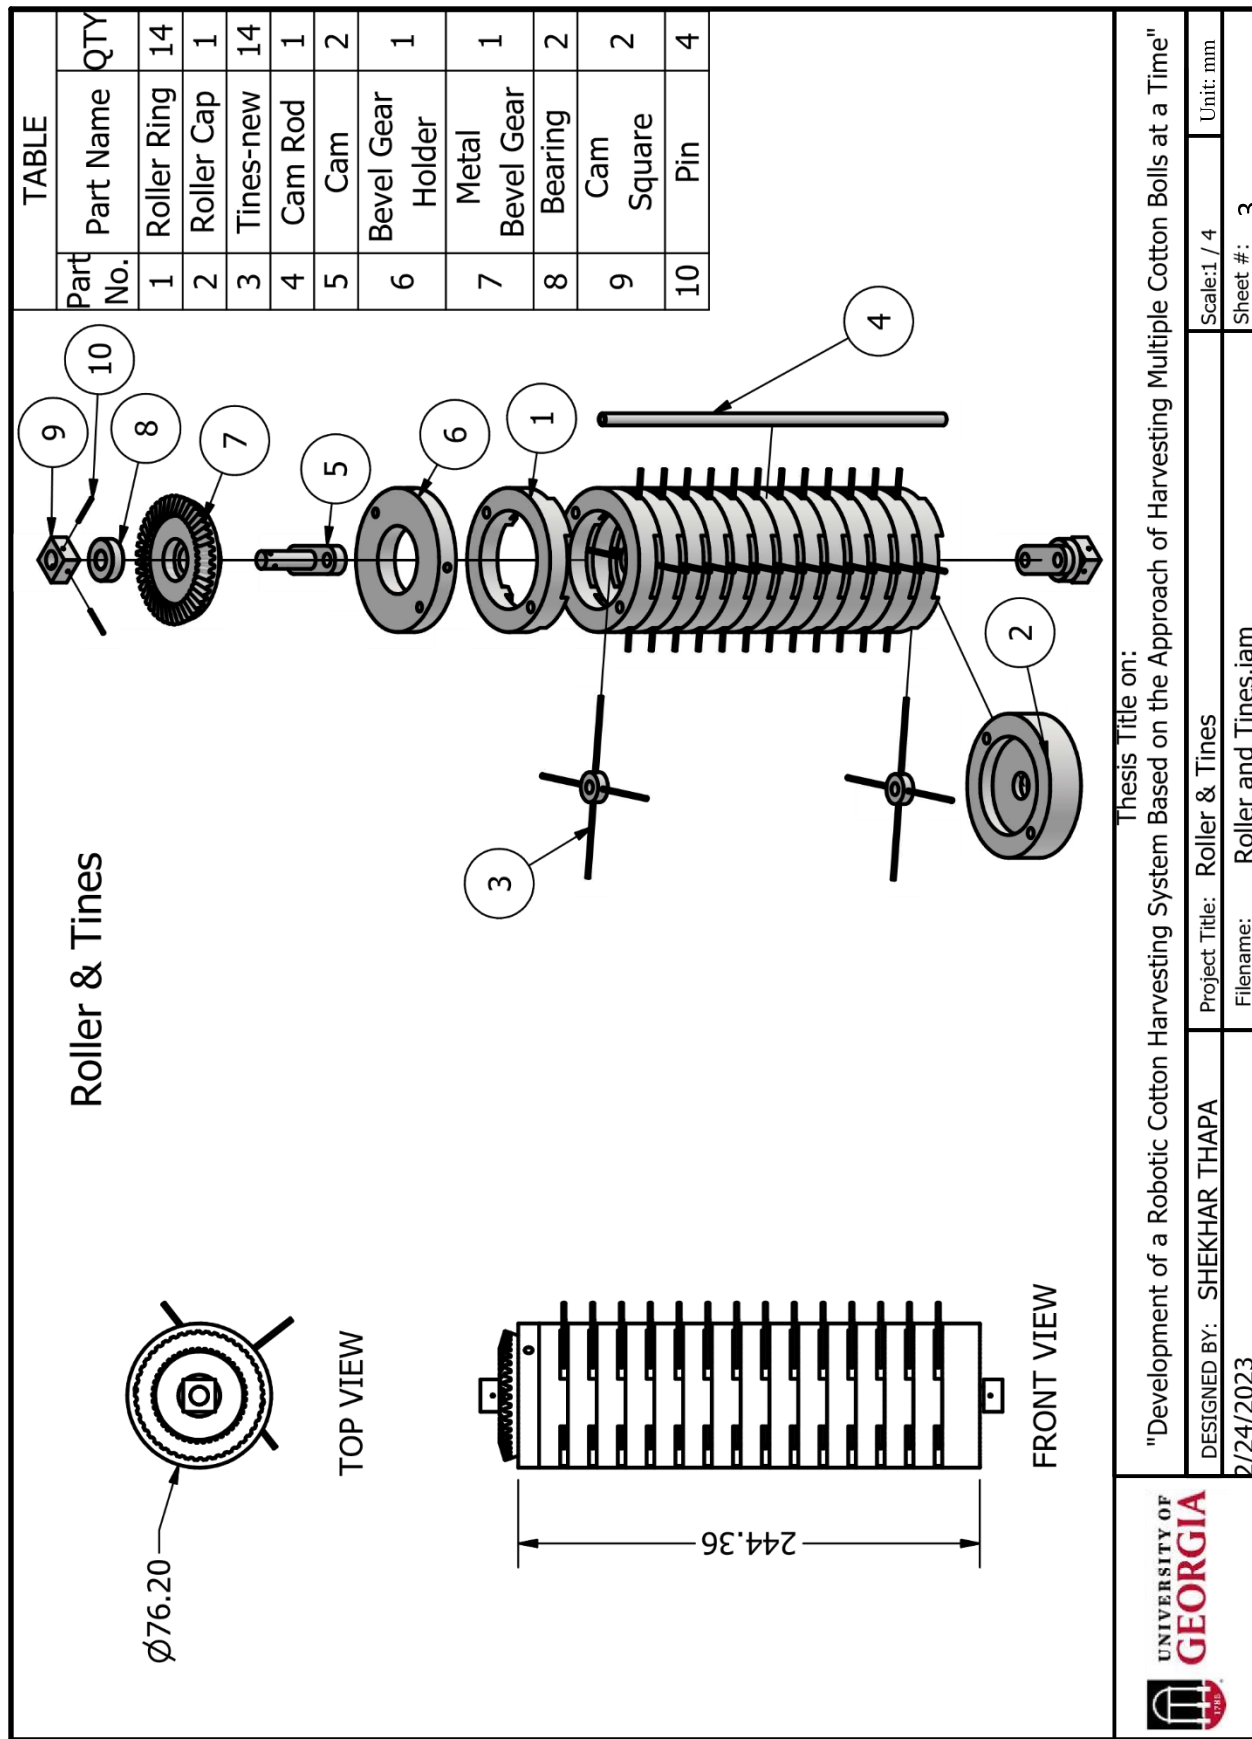

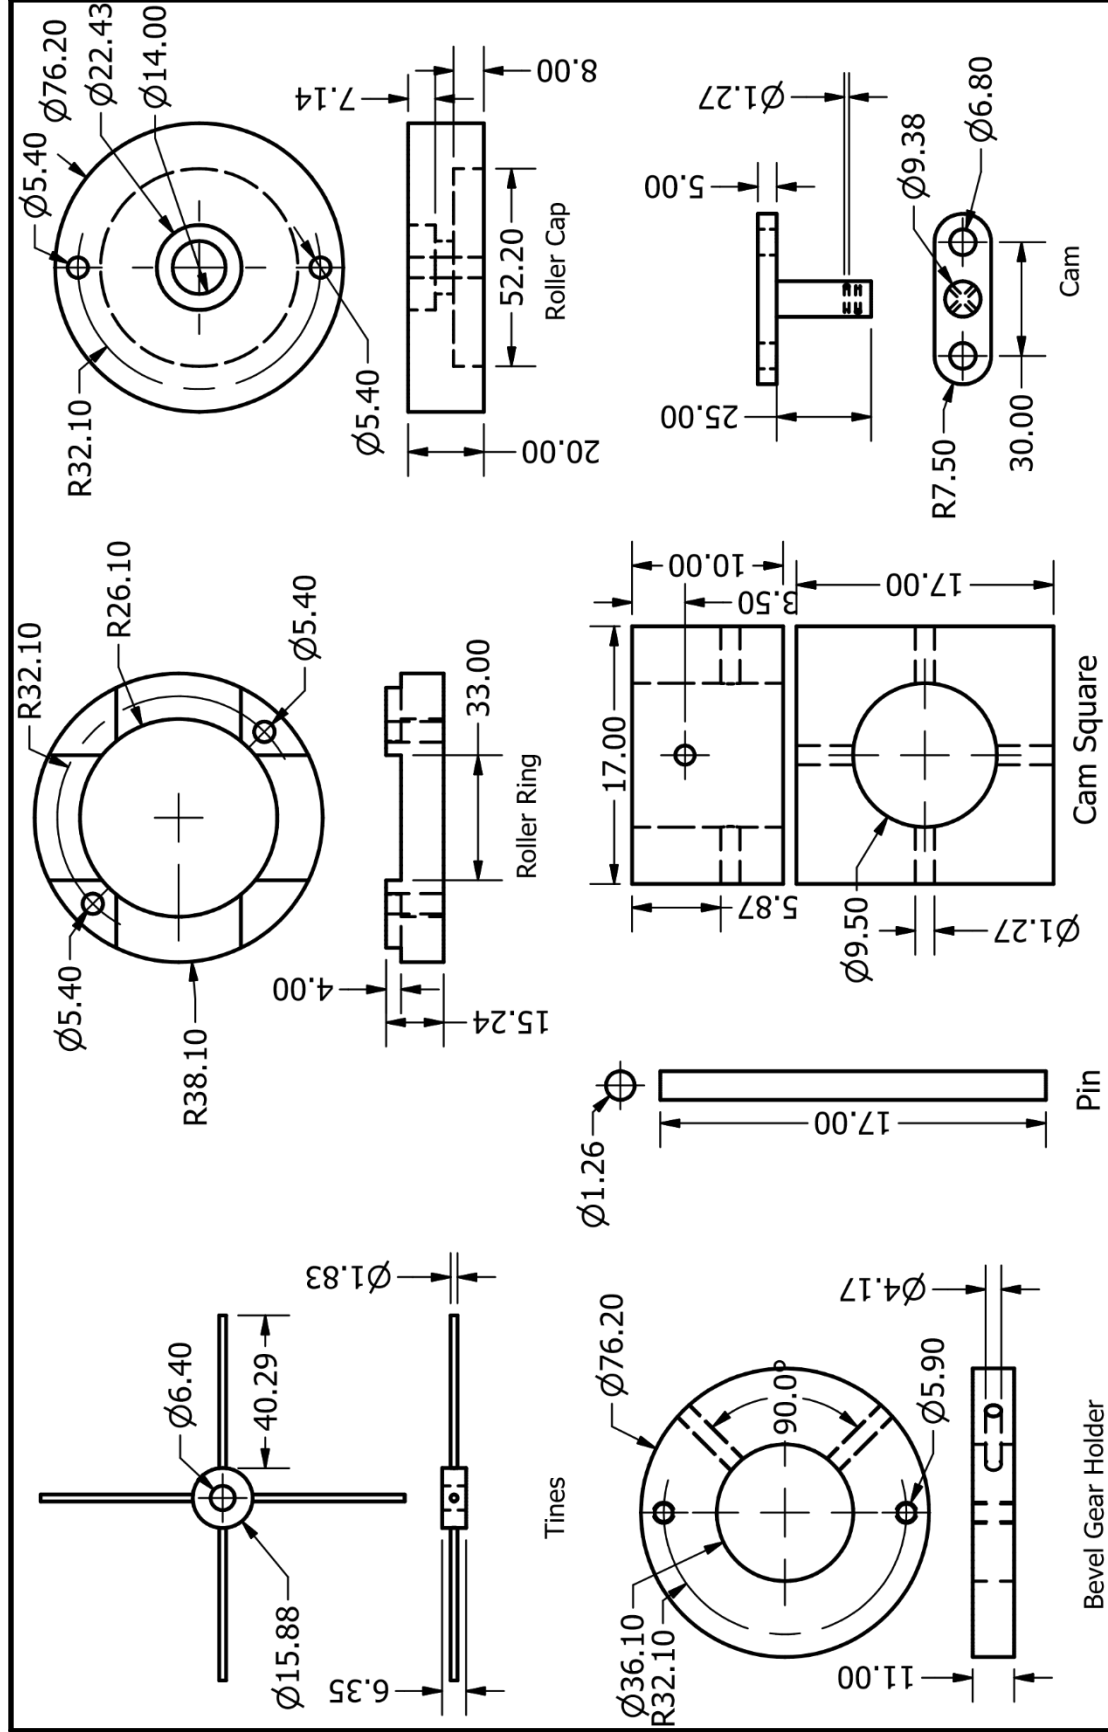

|                                                                                                                    |                                                                                                                         |                                      |            |
|--------------------------------------------------------------------------------------------------------------------|-------------------------------------------------------------------------------------------------------------------------|--------------------------------------|------------|
|  <b>UNIVERSITY OF GEORGIA</b> | Thesis Title on:                                                                                                        |                                      |            |
|                                                                                                                    | "Development of a Robotic Cotton Harvesting System Based on the Approach of Harvesting Multiple Cotton Bolls at a Time" |                                      |            |
|                                                                                                                    | DESIGNED BY: <b>SHEKHAR THAPA</b>                                                                                       | Project Title: <b>Multiple Parts</b> | Scale: 1/2 |
| 02/17/2023                                                                                                         | Filename: <b>Tines-new.ipt</b>                                                                                          | Sheet #: <b>4</b>                    | Unit: mm   |

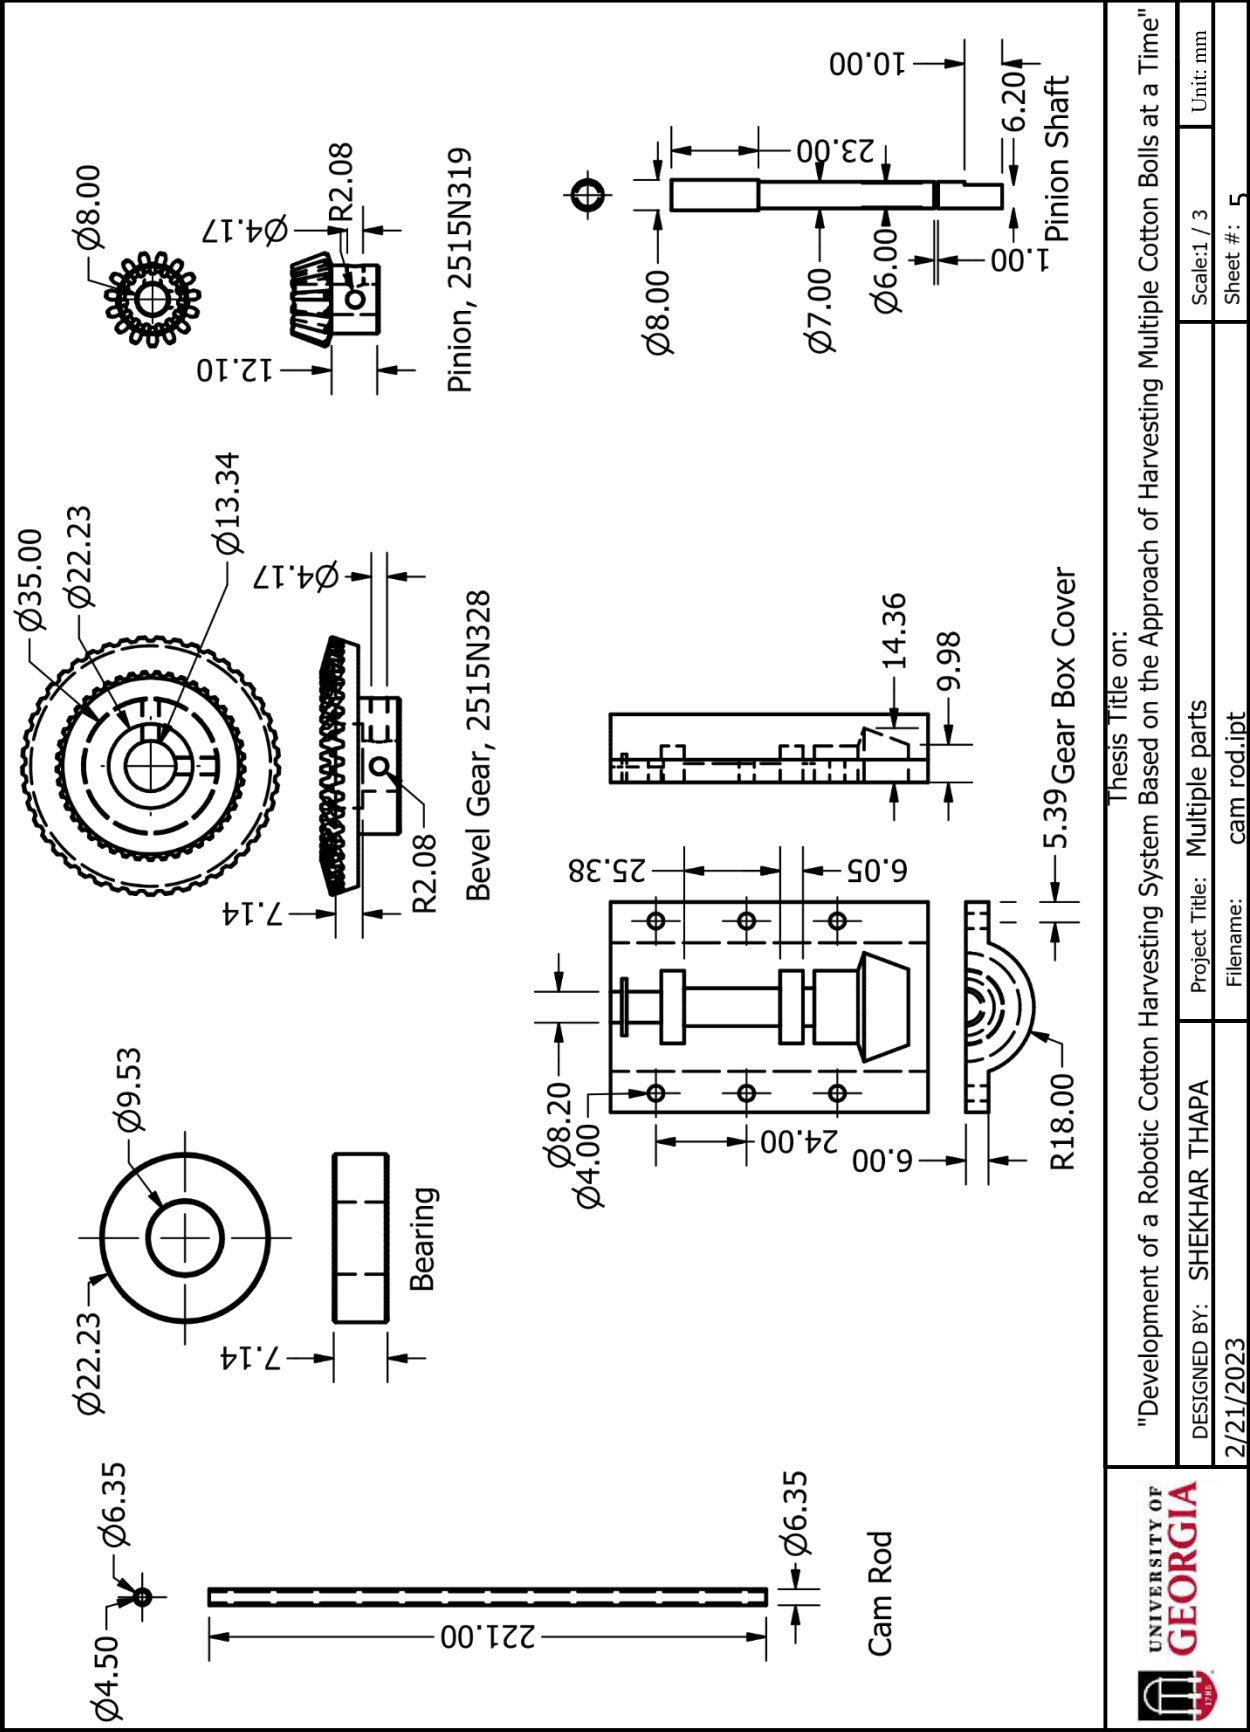

|                            |                               |                                                                                                                                                                             |          |
|----------------------------|-------------------------------|-----------------------------------------------------------------------------------------------------------------------------------------------------------------------------|----------|
| <div> </div>               |                               | <div> <div>Thesis Title on:</div> <div>"Development of a Robotic Cotton Harvesting System Based on the Approach of Harvesting Multiple Cotton Bolls at a Time"</div> </div> |          |
| DESIGNED BY: SHEKHAR THAPA | Project Title: Multiple parts | Scale: 1 / 3                                                                                                                                                                | Unit: mm |
| 2/21/2023                  | Filename: cam rod.ipt         | Sheet #: 5                                                                                                                                                                  |          |

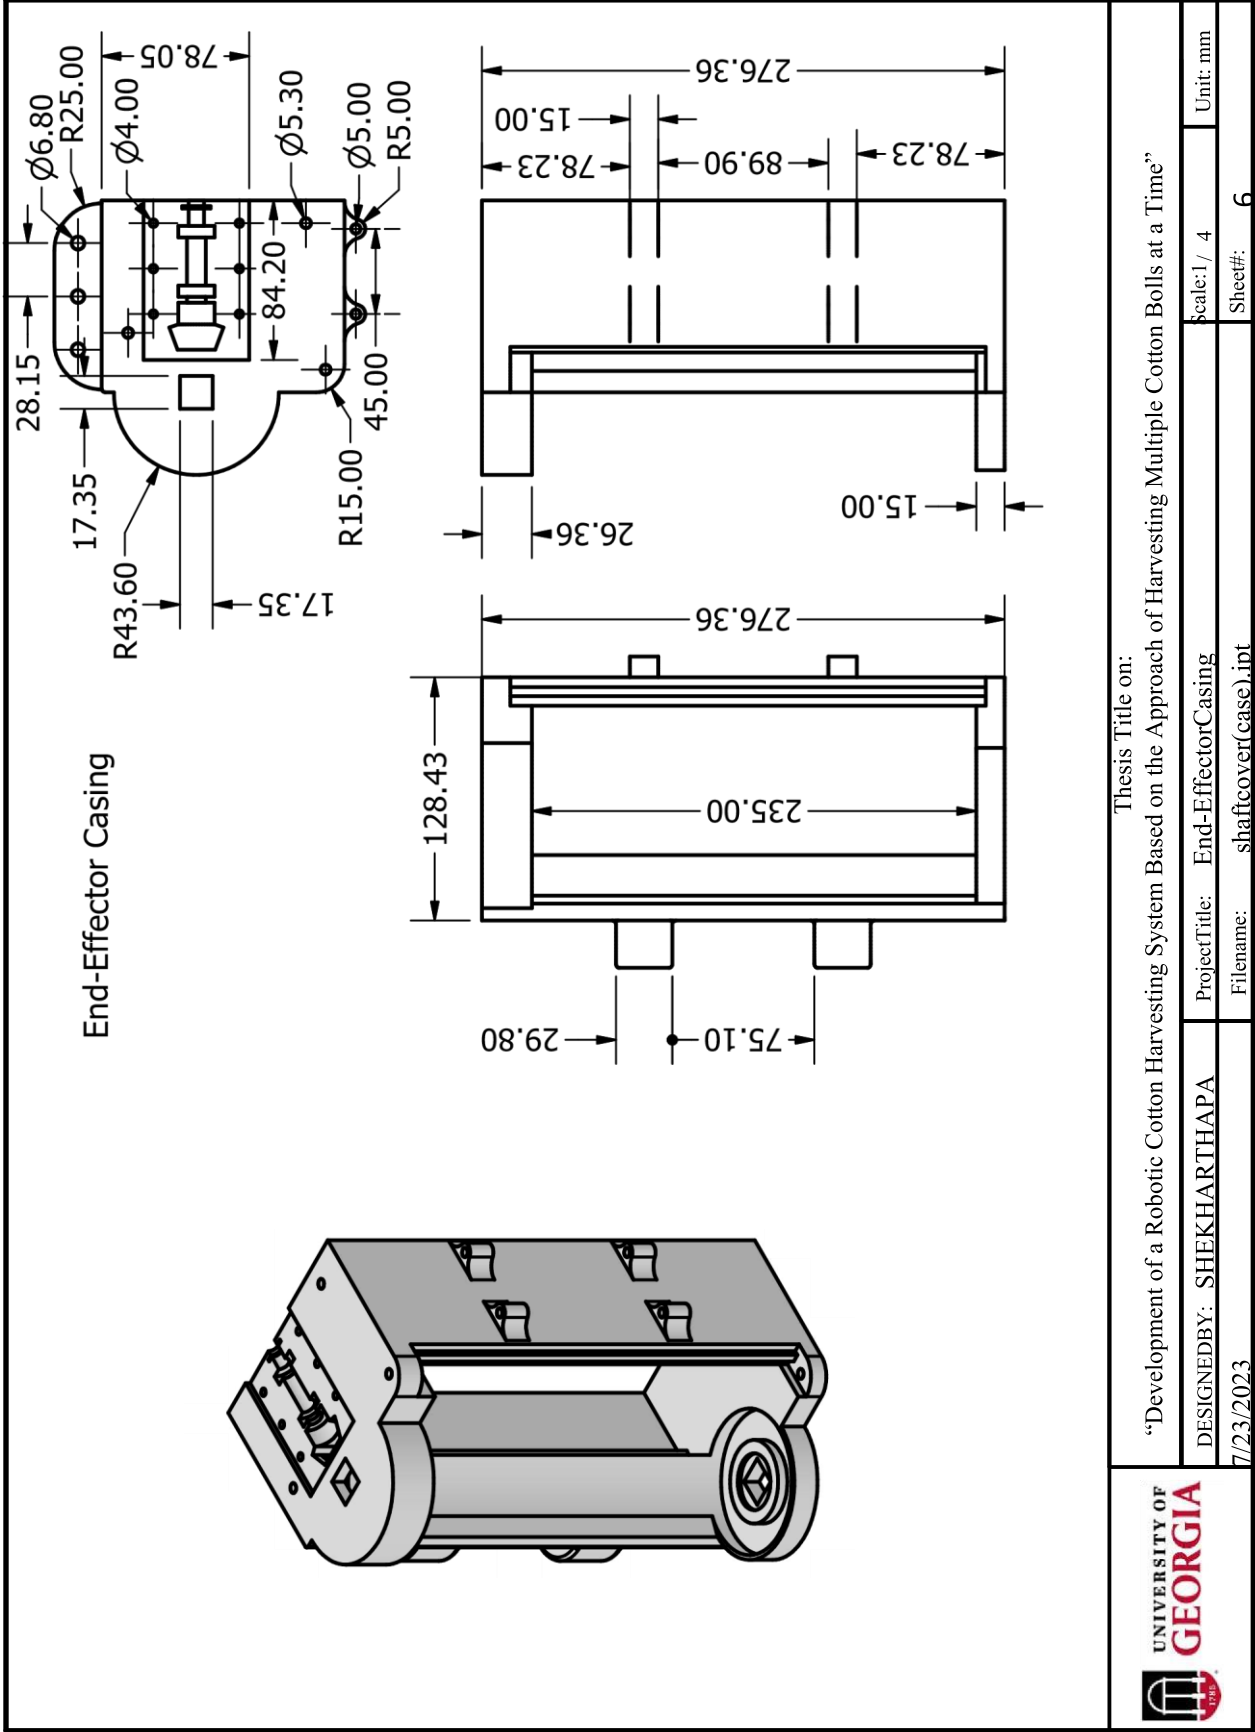

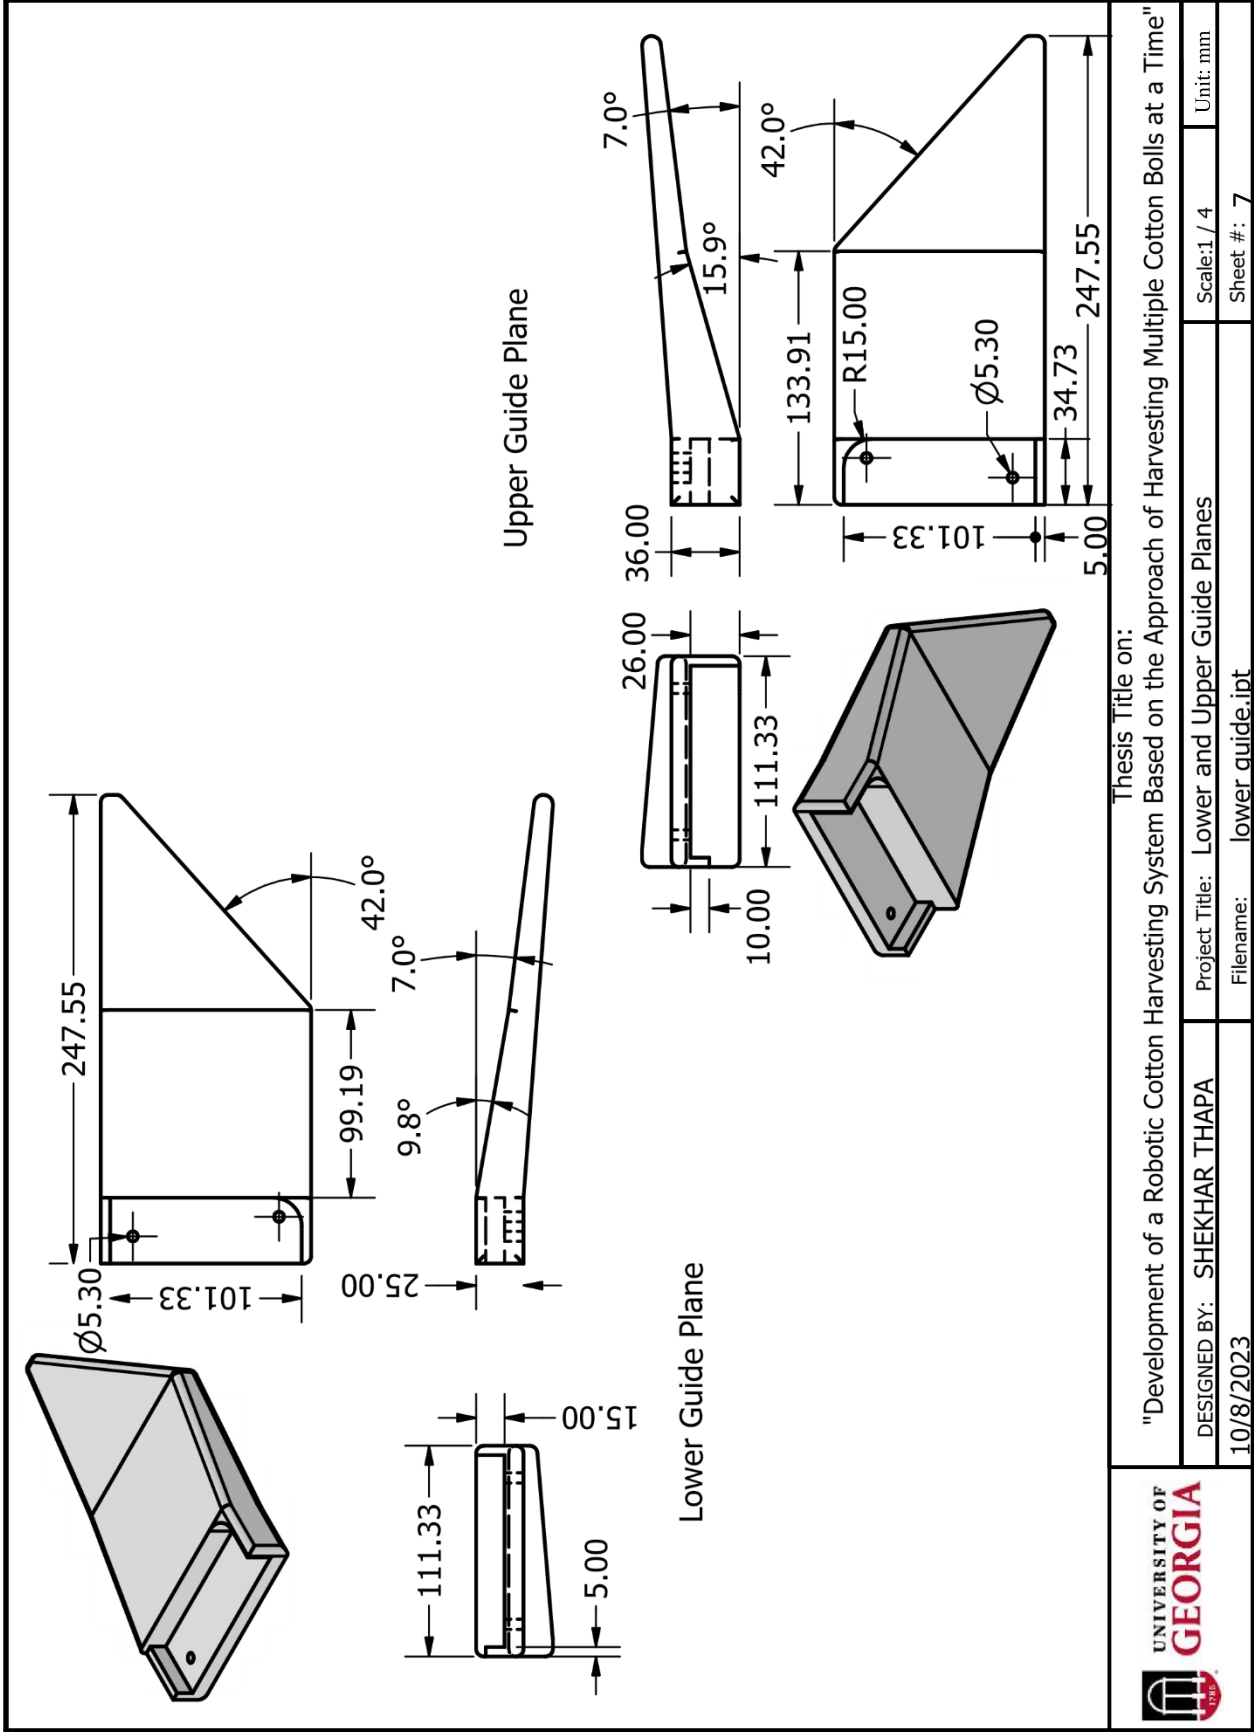



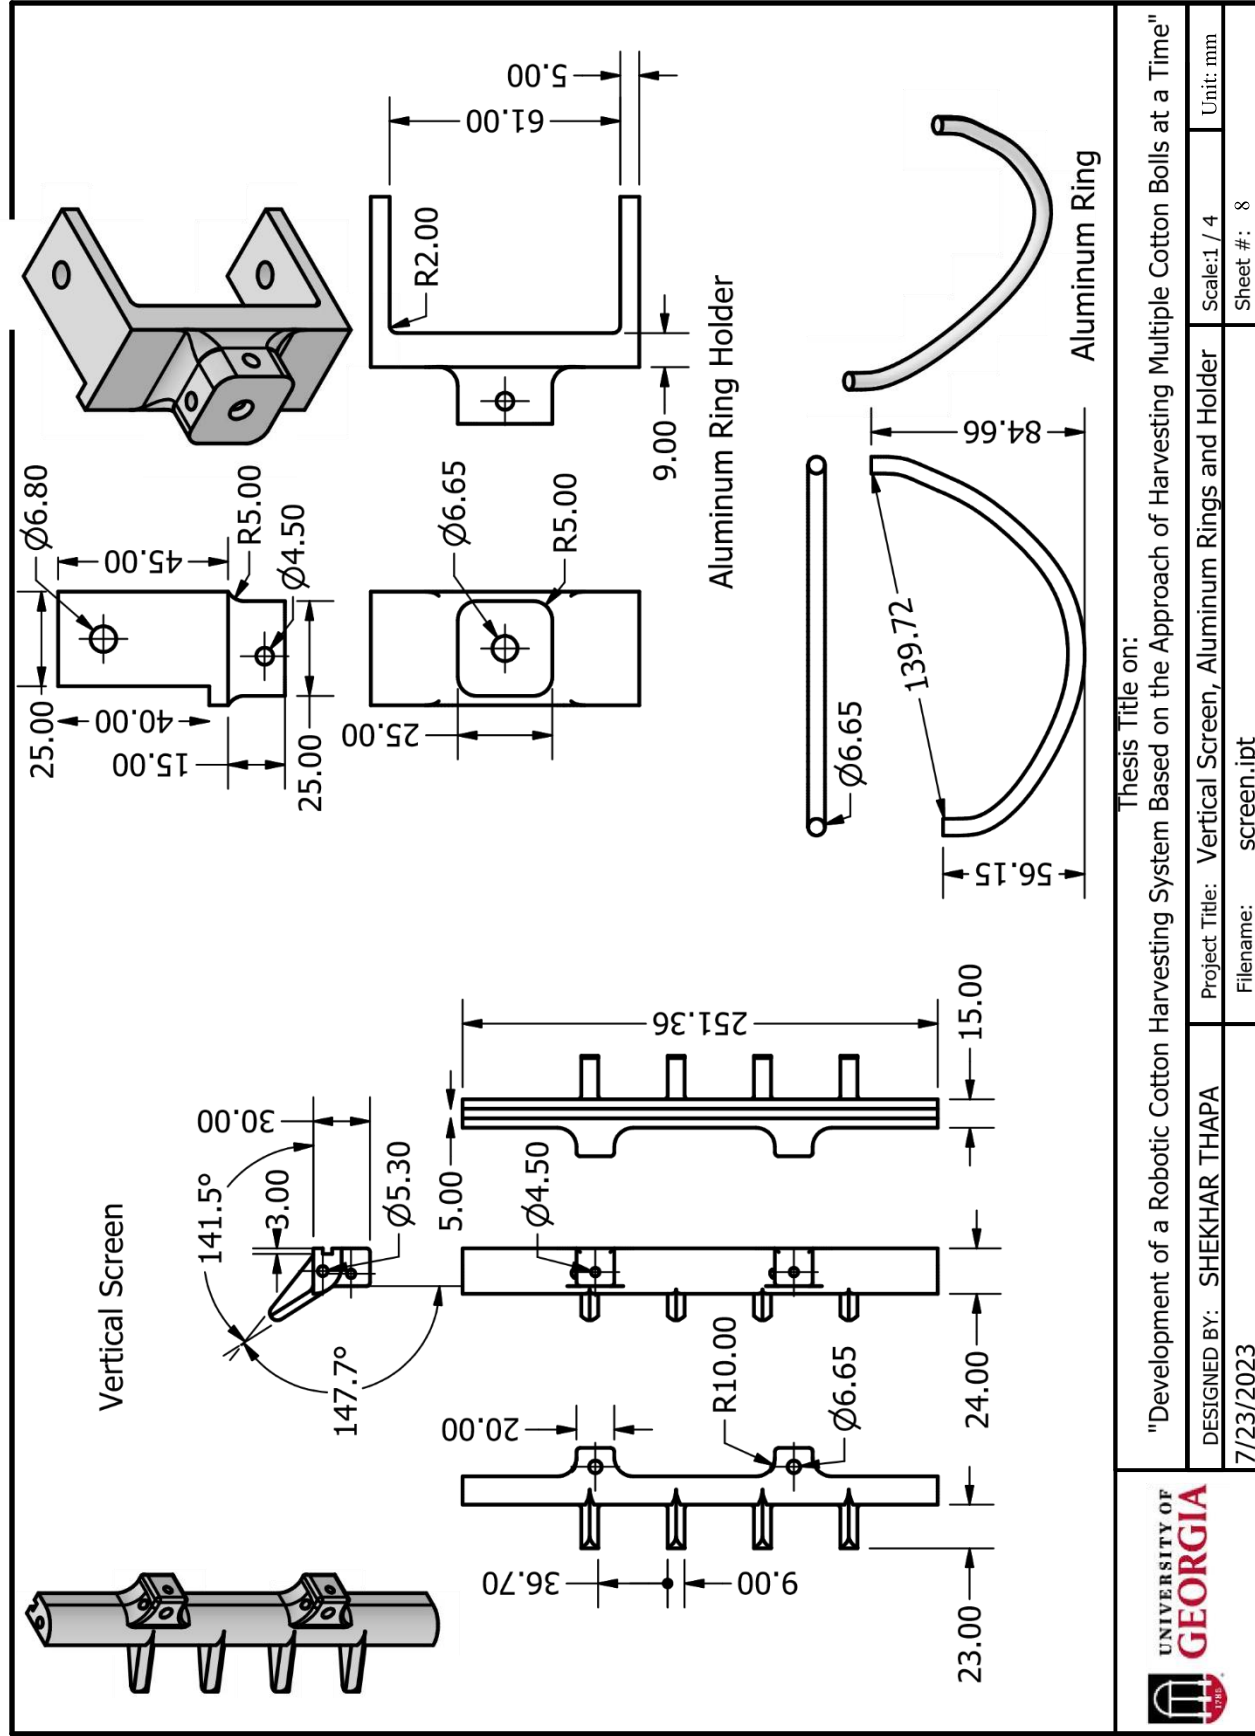

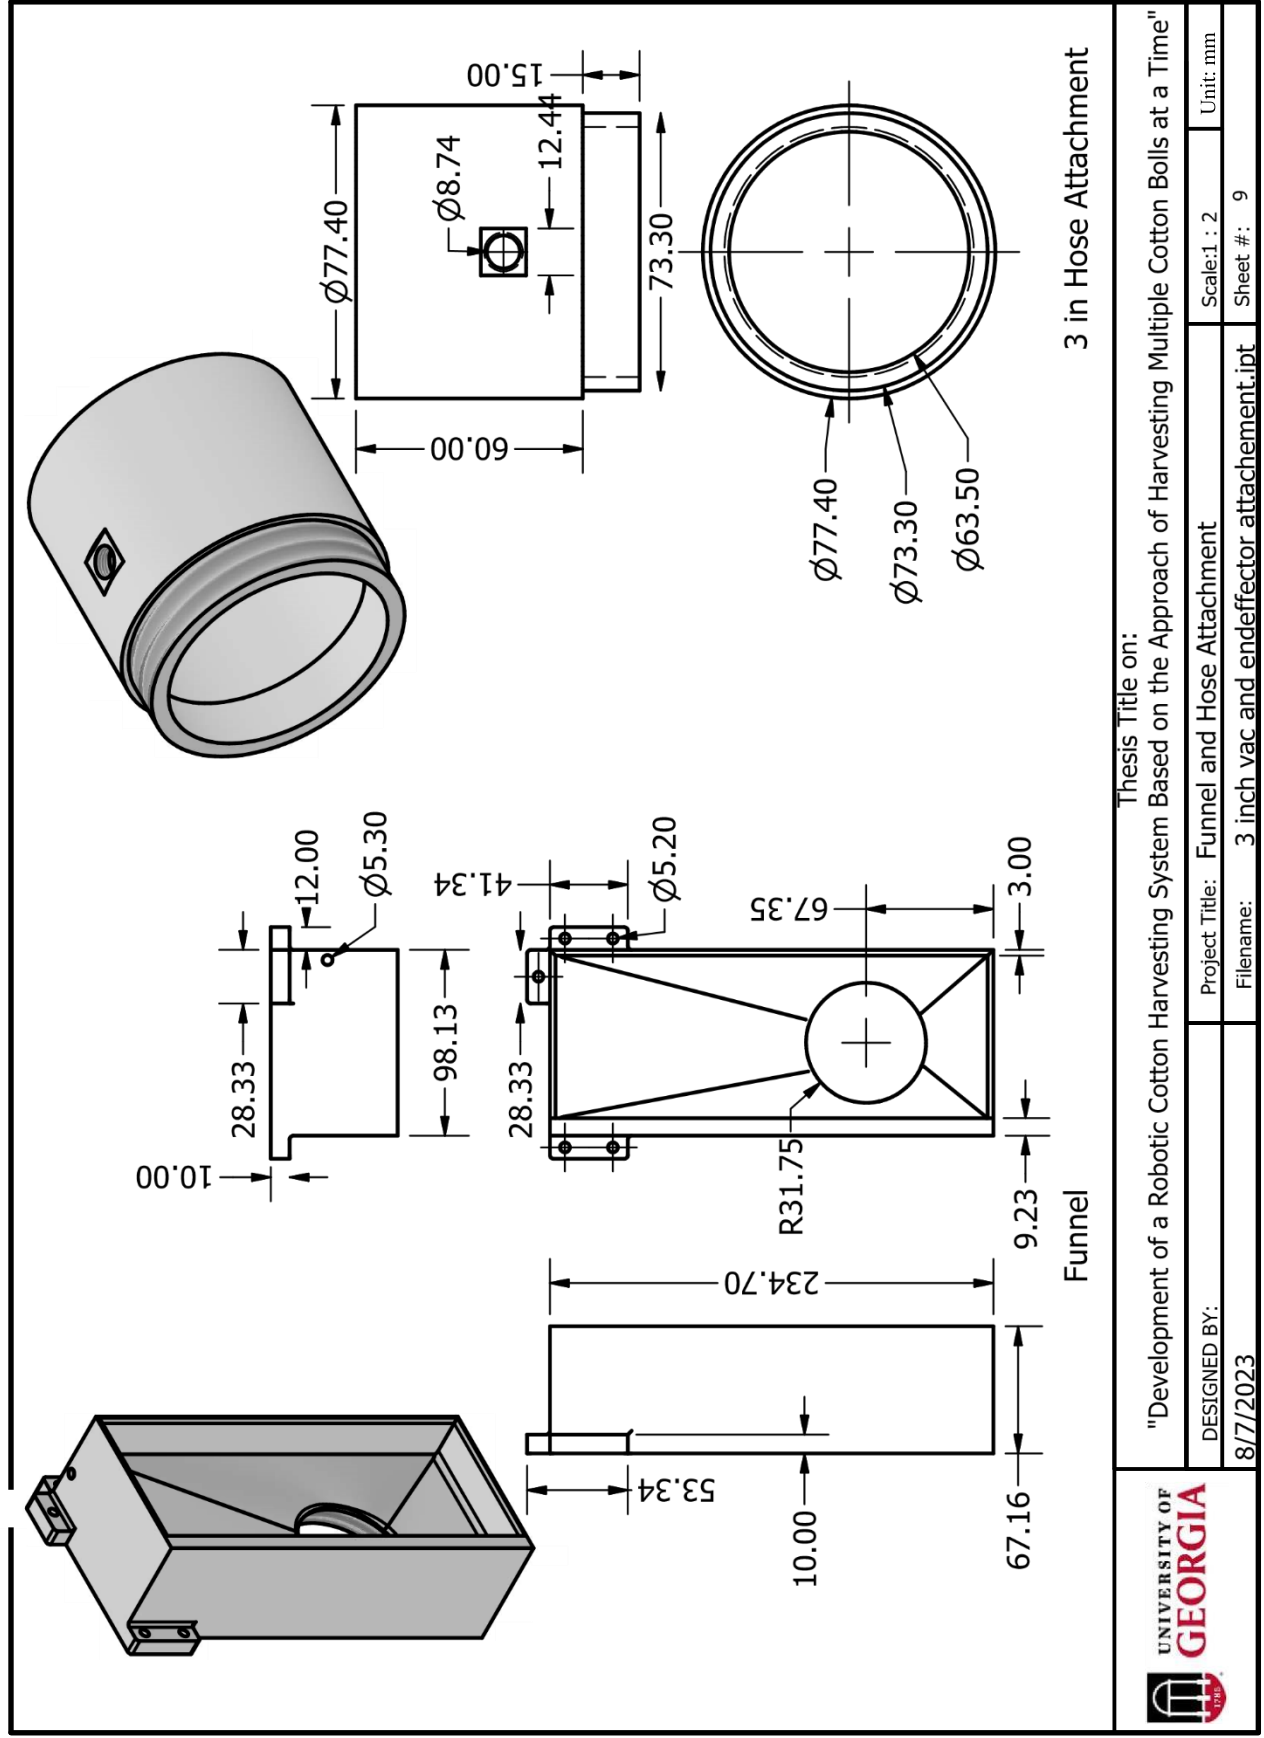

|                                                                                                                         |  |                                                                 |  |
|-------------------------------------------------------------------------------------------------------------------------|--|-----------------------------------------------------------------|--|
| UNIVERSITY OF GEORGIA                                                                                                   |  | Thesis Title on:                                                |  |
| "Development of a Robotic Cotton Harvesting System Based on the Approach of Harvesting Multiple Cotton Bolls at a Time" |  | Project Title: Funnel and Hose Attachment                       |  |
| DESIGNED BY: 8/7/2023                                                                                                   |  | Scale: 1 : 2 Unit: mm                                           |  |
|                                                                                                                         |  | Filename: 3 inch vac and endeffector attachment.Lipt Sheet #: 9 |  |

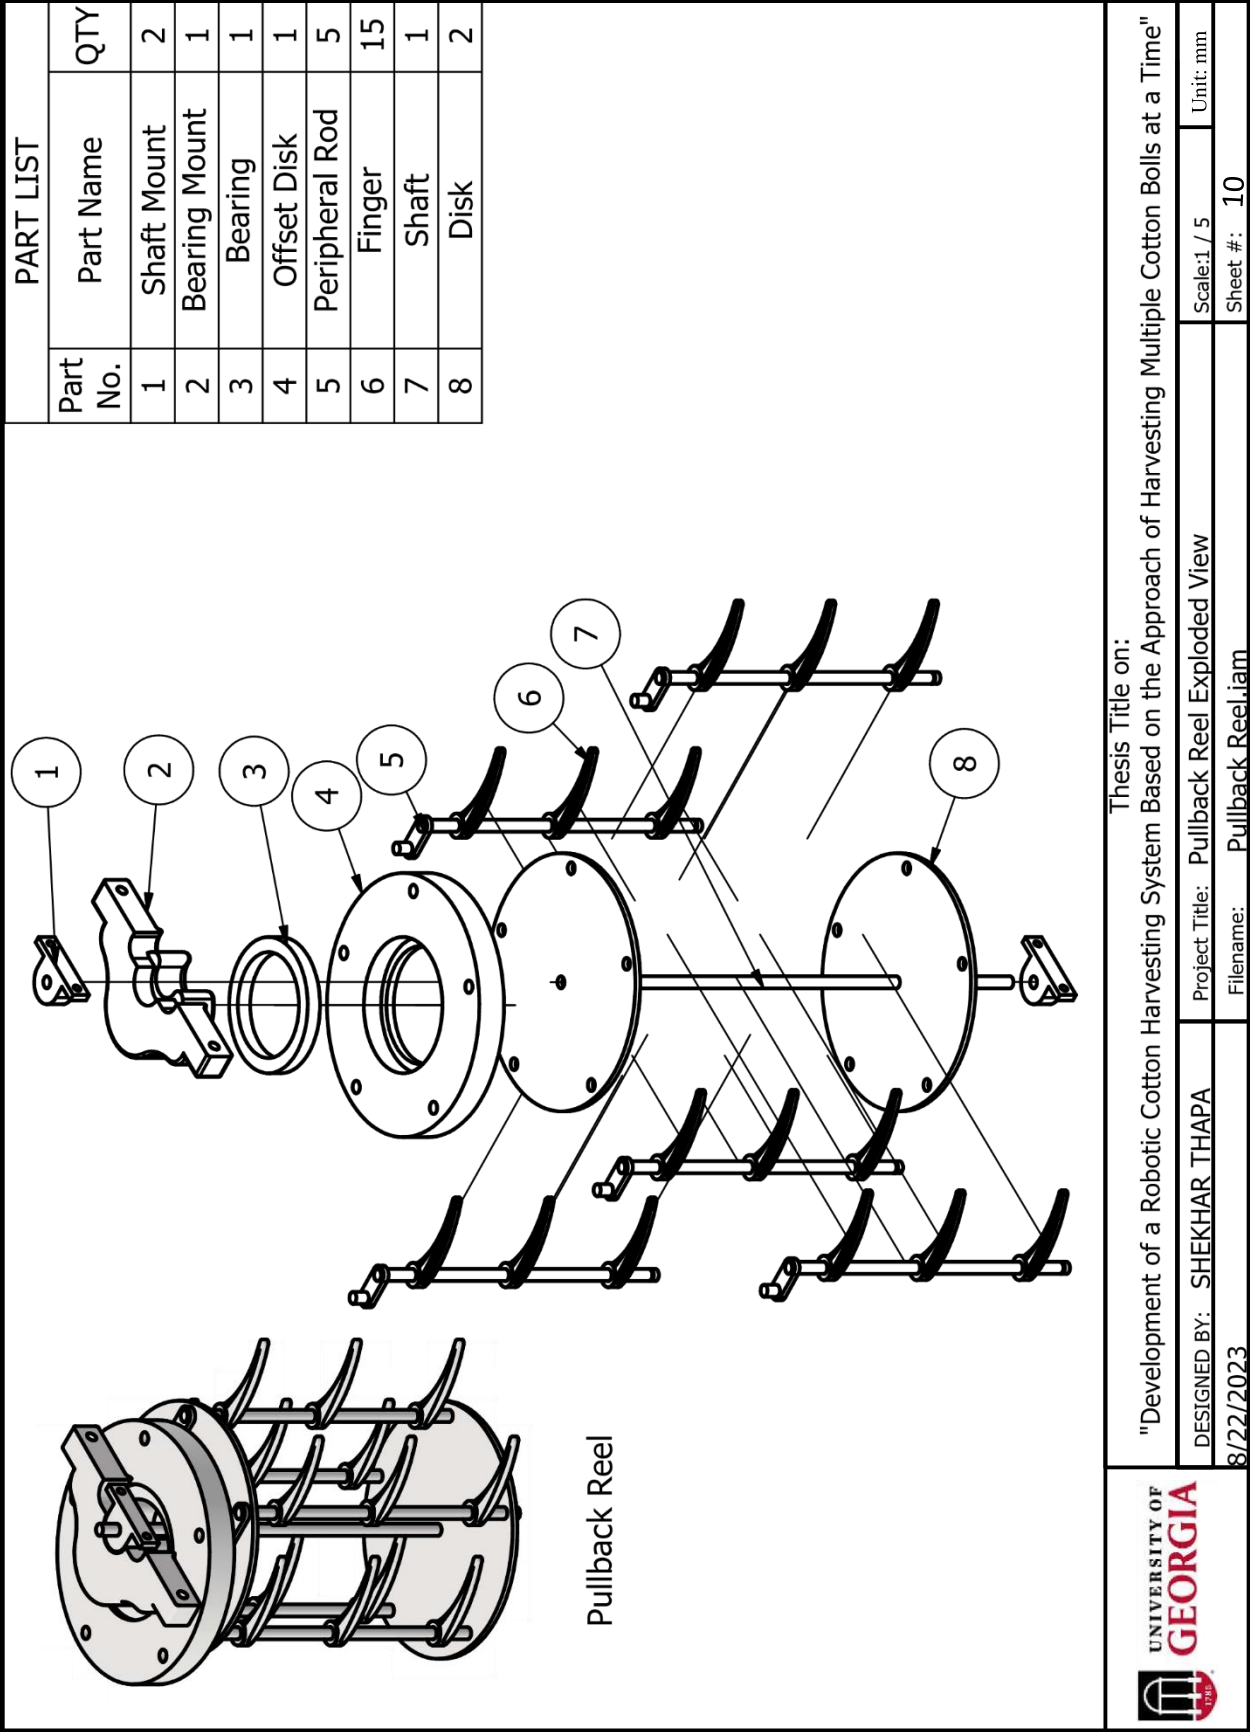

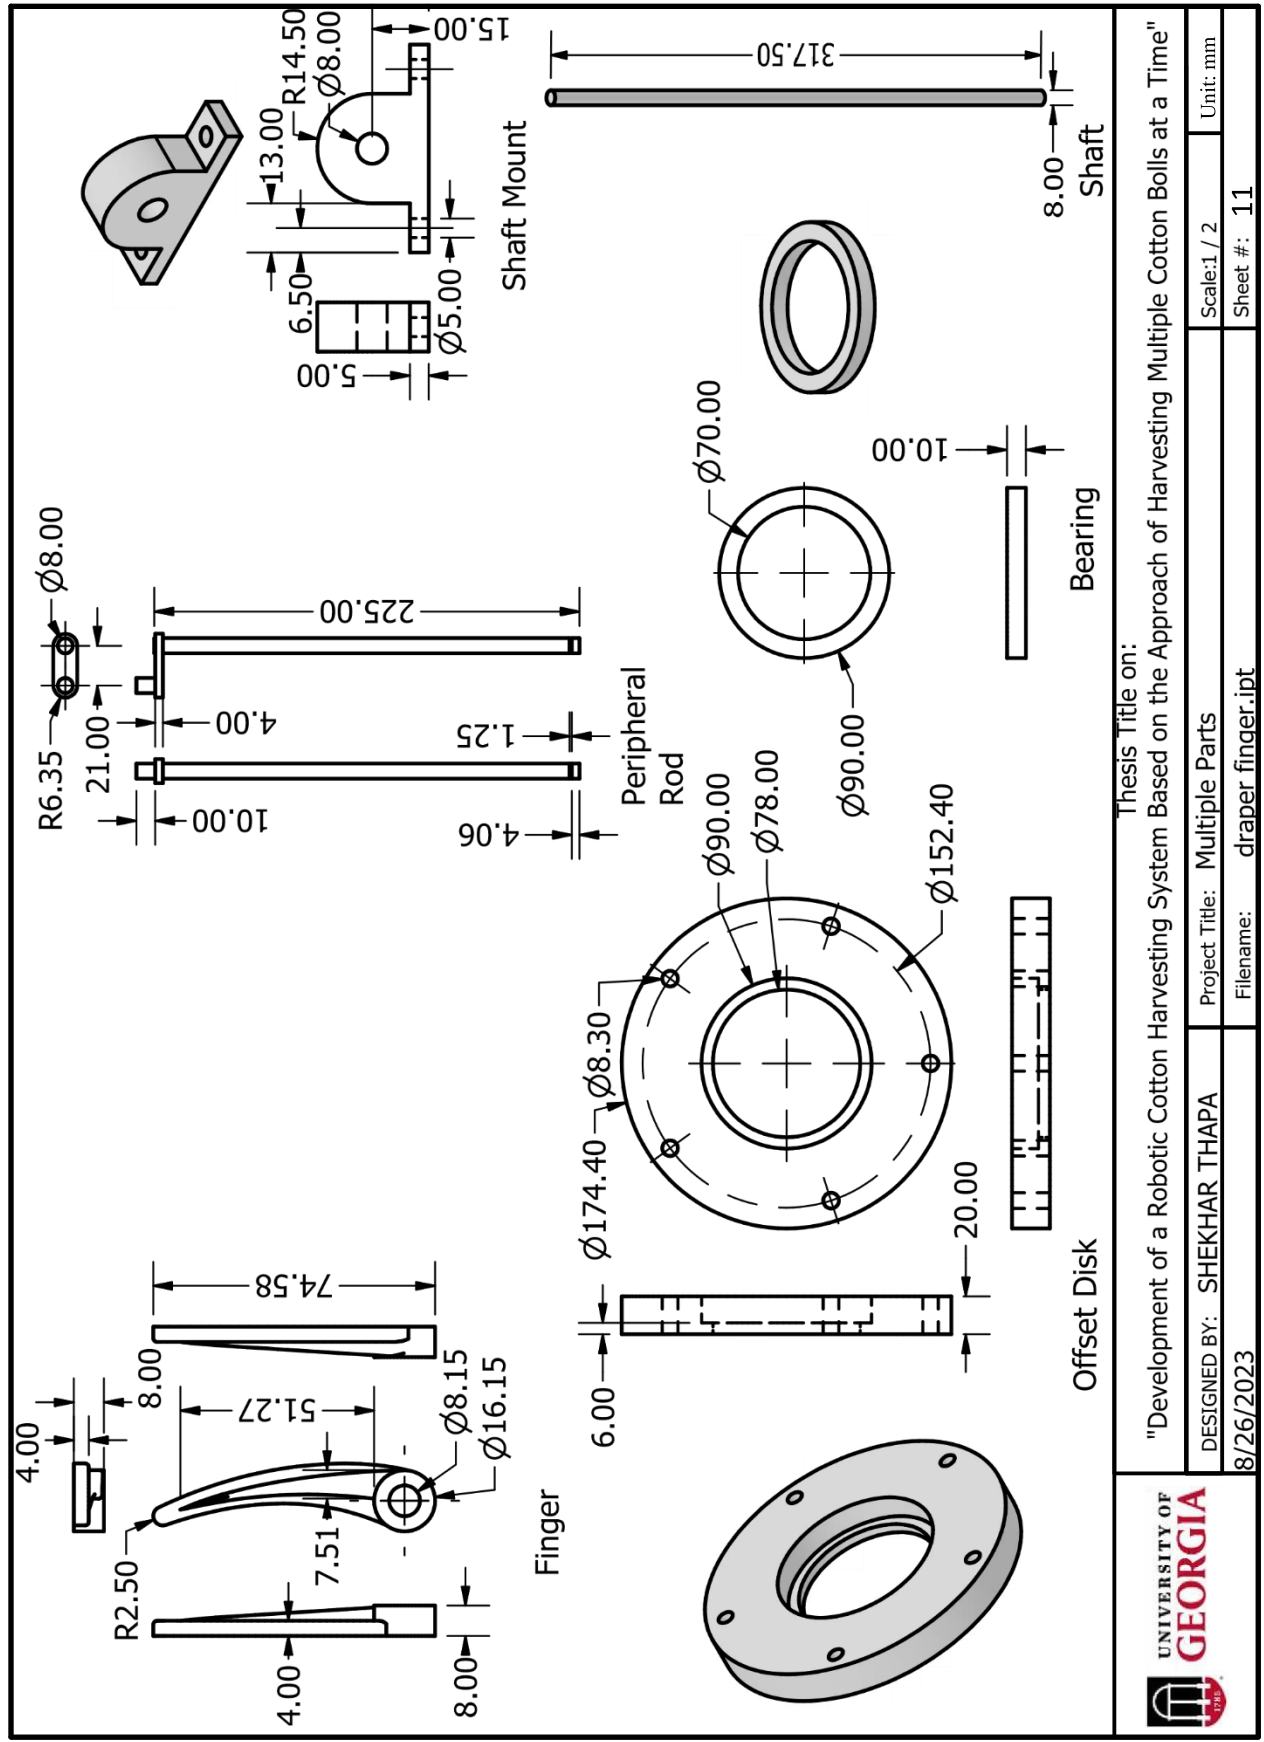

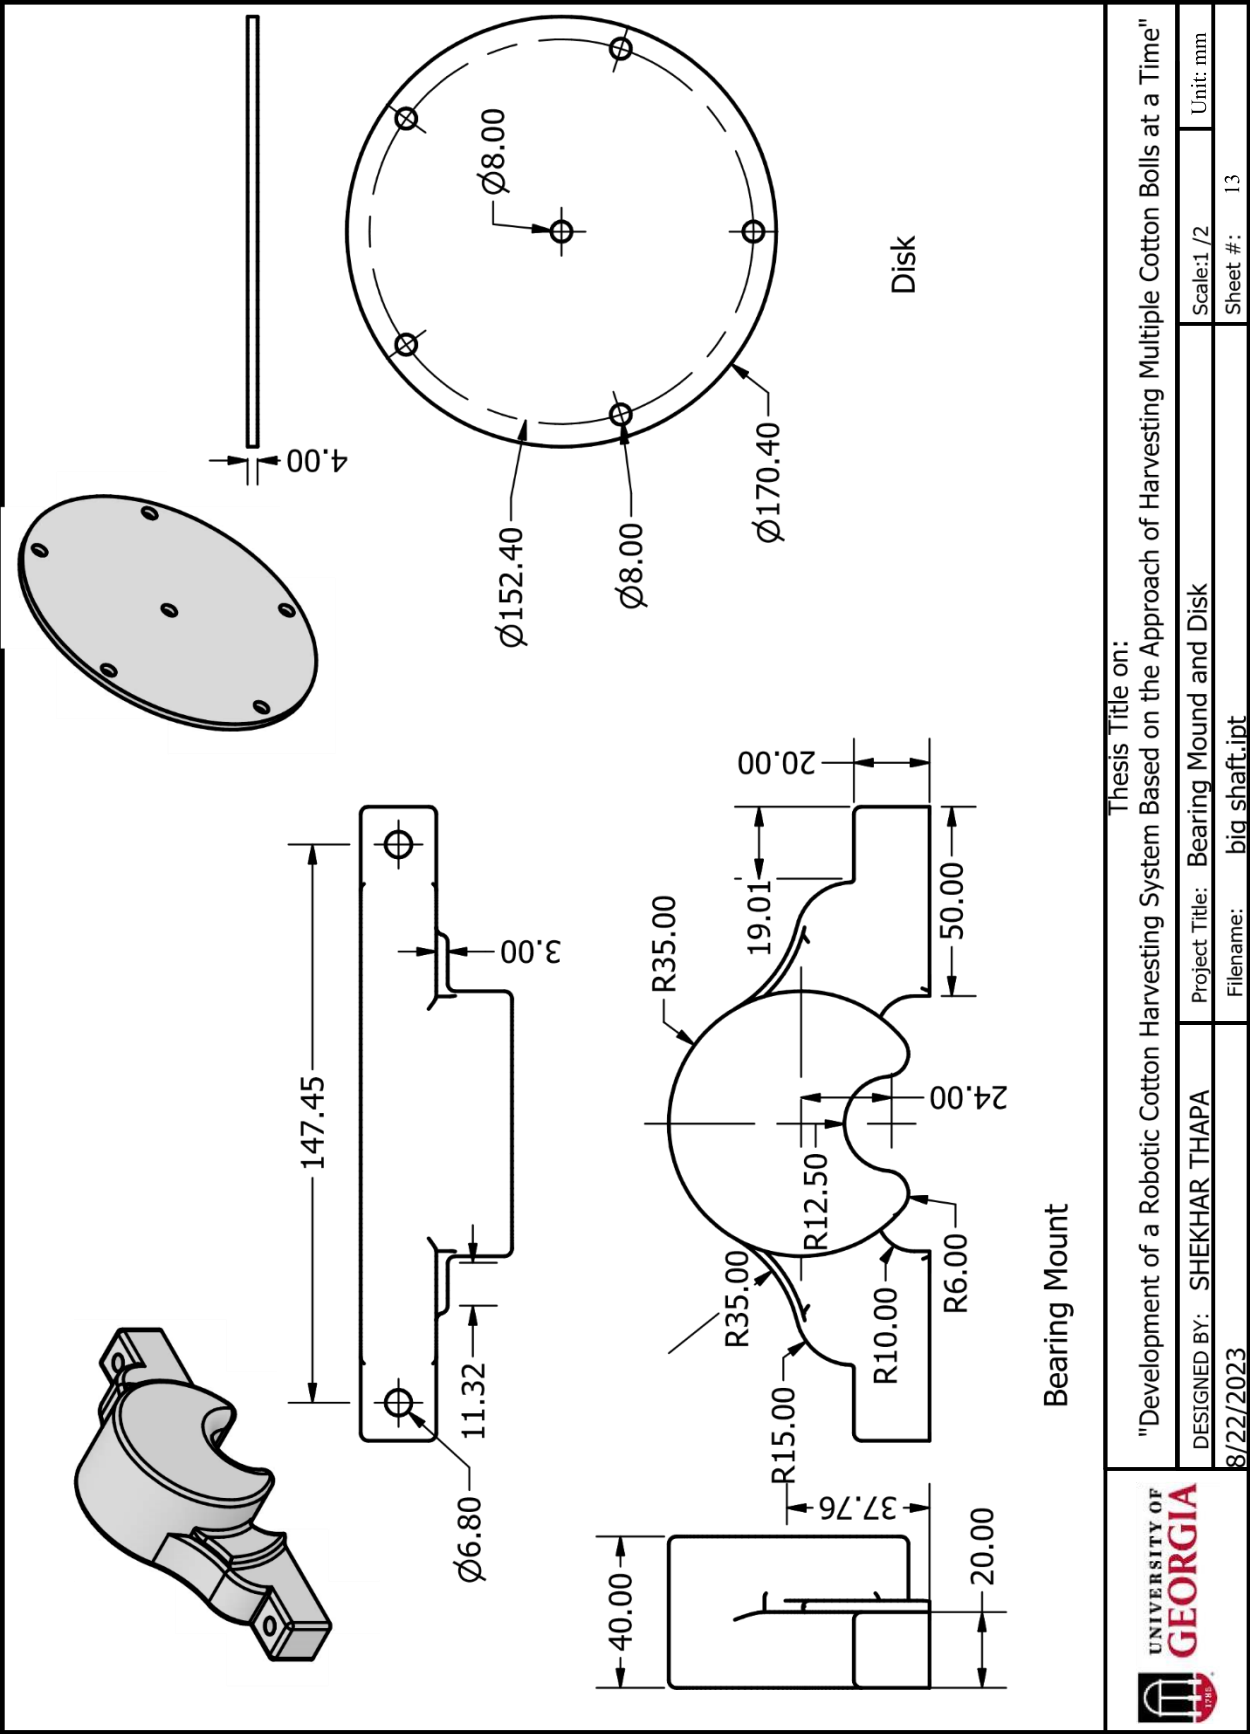

Supplement: s1 [file s1]
